# Supplementary material for: The Shu complex interacts with Rad51 through the Rad51 paralogues Rad55–Rad57 to mediate error-free recombination
Source: PubMed Central journal article supplement — Nucleic Acids Res. 2013 Mar 4;41(8):4525–34. doi: 10.1093/nar/gkt138 (PMC3632125; doi:10.1093/nar/gkt138), 2013-03-04
Supplement: supp_gkt138_nar-03090-d-2012-File009.pdf [file supp_gkt138_nar-03090-d-2012-File009.pdf]

**SUPPLEMENTARY TABLE 1: Strains and plasmids**

| Name            | Description                                                                                                                                                                                     |
|-----------------|-------------------------------------------------------------------------------------------------------------------------------------------------------------------------------------------------|
| W1588-4A        | <i>MAT<math>\alpha</math></i> <i>ade2-1 can1-100 his3-11,15 leu2-3,112 trp1-1 ura3-1 RAD5</i>                                                                                                   |
| W5909-1B        | <i>MATa ADE2 TRP1 lys2<math>\Delta</math></i><br><i>MATa trp1-901 leu2-3,112 ura3-52 his3-200 gal4<math>\Delta</math></i>                                                                       |
| PJ69-4A         | <i>gal80<math>\Delta</math> GAL2-ADE2 LYS2::GAL1-HIS3</i><br><i>met2::GAL7-lacZ</i><br><i>MAT<math>\alpha</math> trp1-901 leu2-3,112 ura3-52 his3-200 gal4<math>\Delta</math></i>               |
| PJ69-4 $\alpha$ | <i>gal80<math>\Delta</math> GAL2-ADE2 LYS2::GAL1-HIS3</i><br><i>met2::GAL7-lacZ</i><br><i>MATa trp1-901 leu2-3,112 ura3-52 his3-200 gal4<math>\Delta</math></i>                                 |
| KBY 217         | <i>gal80<math>\Delta</math> GAL2-ADE2 LYS2::GAL1-HIS3</i><br><i>met2::GAL7-lacZ rad51::natMX4</i><br><i>MAT<math>\alpha</math> trp1-901 leu2-3,112 ura3-52 his3-200 gal4<math>\Delta</math></i> |
| KBY 222         | <i>gal80<math>\Delta</math> GAL2-ADE2 LYS2::GAL1-HIS3</i><br><i>met2::GAL7-lacZ rad51::natMX4</i><br><i>MATa trp1-901 leu2-3,112 ura3-52 his3-200 gal4<math>\Delta</math></i>                   |
| KBY 212         | <i>gal80<math>\Delta</math> GAL2-ADE2 LYS2::GAL1-HIS3</i><br><i>met2::GAL7-lacZ rad55::natMX4</i><br><i>MAT<math>\alpha</math> trp1-901 leu2-3,112 ura3-52 his3-200 gal4<math>\Delta</math></i> |
| KBY 221         | <i>gal80<math>\Delta</math> GAL2-ADE2 LYS2::GAL1-HIS3</i><br><i>met2::GAL7-lacZ rad55::hphMX4</i>                                                                                               |
| W3770-4D        | <i>MATa leu2-<math>\Delta</math>EcoRI::URA3::leu2-<math>\Delta</math>BstEII</i>                                                                                                                 |
| KBY57-1B        | <i>MATa leu2-<math>\Delta</math>EcoRI::URA3-HO::leu2-<math>\Delta</math>BstEII</i><br><i>psy3::KanMX4</i>                                                                                       |
| KBY38-3B        | <i>MATa leu2-<math>\Delta</math>EcoRI::URA3-HO::leu2-<math>\Delta</math>BstEII</i><br><i>csm2::KanMX4</i>                                                                                       |
| KBY65-21C       | <i>MATa leu2-<math>\Delta</math>EcoRI::URA3-HO::leu2-<math>\Delta</math>BstEII rad55<math>\Delta</math></i>                                                                                     |

|              |                                                                                                           |
|--------------|-----------------------------------------------------------------------------------------------------------|
| KBY65-1C     | <i>MATa leu2-ΔEcoRI::URA3-HO::leu2-ΔBstEII</i><br><i>csm2::KanMX4 rad55Δ</i>                              |
| KBY65-12B    | <i>MATa csm2::KanMX rad55Δ leu2-ΔEcoRI::URA3-</i><br><i>HO::leu2-ΔBstEII</i>                              |
| KBY15-2A     | <i>MATa csm2::KanMX</i>                                                                                   |
| KBY89-2B     | <i>MATα rad51::LEU2 ade2-n::TRP1::ade2-I-SceI</i><br><i>lys2::GAL-I-SceI</i>                              |
| W4121-9B     | <i>MATa rad55Δ bar1::LEU2</i>                                                                             |
| W3791-2B     | <i>MATa rad57::LEU2 YFP-8ala-RAD55 bar1::LEU2</i>                                                         |
| KBY107-5C    | <i>MATa csm2::KanMX</i>                                                                                   |
| KBY108-1C    | <i>MATa psy3::KanMX bar1::LEU2</i>                                                                        |
| W9100-2D     | <i>MATα ADE2 leu2-3,112 his3-11,15 ura3-1 TRP1 lys2Δ</i>                                                  |
| W3778-2B     | <i>MATa YFP-8ala-RAD55 bar1::LEU2</i>                                                                     |
| KBY108-5A    | <i>MATα psy3::KanMX4 YFP-8ala-Rad55</i>                                                                   |
| KBY107-4A    | <i>MATα csm2::KanMX YFP-8ala-Rad55</i>                                                                    |
| pWJ1481      | <i>pGBD-CSM2 (TRP, KAN<sup>R</sup>)</i>                                                                   |
| pKBB5        | <i>pGBD-PSY3 (TRP, KAN<sup>R</sup>)</i>                                                                   |
| pGBD-C1      | <i>pGBD-C1 (TRP, KAN<sup>R</sup>)</i>                                                                     |
| pGAD-C2      | <i>pGAD-C2 (LEU, AMP<sup>R</sup>)</i>                                                                     |
| pGAD-RAD51   | <i>pGAD-C2-RAD51 (cloned SmaI to Sall; LEU, AMP<sup>R</sup>)</i>                                          |
| pGAD-RAD55   | <i>pGAD-RAD55 (LEU, AMP<sup>R</sup>)</i>                                                                  |
| pGAD-RAD57   | <i>pGAD-RAD57 (LEU, AMP<sup>R</sup>)</i>                                                                  |
| pWJ1921      | <i>pCDF-DUET1 with CSM2-TEV in MCS1 (PstI to</i><br><i>HindIII) and TEV-PSY3 in MCS2 (BglIII to KpnI)</i> |
| pRS313-RAD51 | <i>pRS313-RAD51 (CEN, HIS, AMP<sup>R</sup>)</i>                                                           |
| pRS416       | <i>pRS416 (CEN, URA, AMP<sup>R</sup>)</i>                                                                 |
| pRS413       | <i>pRS413 (CEN, HIS, AMP<sup>R</sup>)</i>                                                                 |
| pRS313-RAD57 | <i>pRS313-RAD57 (CEN, HIS, AMP<sup>R</sup>)</i>                                                           |
| pRS316-RAD55 | <i>pRS316-RAD55 (CEN, URA, AMP<sup>R</sup>)</i>                                                           |

---

All yeast strains are W303 background derivatives and *RAD5* (23) W1588 (24) except for PJ69-4A and PJ69-4 $\alpha$  (25). The KBY217 and KBY212 were constructed in PJ69-4A strain background whereas KBY222 and KBY221 were constructed in PJ69-4 $\alpha$  strain background. The strains are listed in the order they appear in the figures and text.

## Supplemental Figure 1

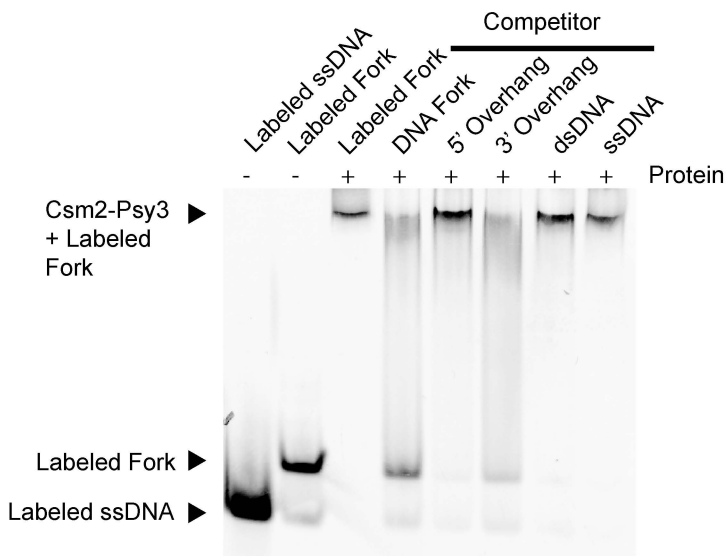

Supplemental Figure 1. The forked DNA and 3' overhang DNA substrates are preferentially bound by the Csm2-Psy3 heterodimer by electrophoretic mobility shift assay. Fluorescein-labeled DNA fork (2.6 pmol) was incubated on ice for 20 minutes with the Csm2-Psy3 heterodimer (30 pmol) either alone or in the presence of 13 pmol unlabeled DNA competitors (DNA fork, 5' overhang, 3' overhang, dsDNA, and ssDNA). Protein-free fluorescein-labeled ssDNA and fluorescein-labeled fork are shown on the left-hand side of the gel.

## **SUPPLEMENTARY METHODS**

**Competition electrophoretic mobility shift assay (EMSA).** Fluorescein-labeled DNA fork (260 nM), detailed in Table 1, with or without an unlabeled competitor DNA oligonucleotide (1300 nM), was incubated on ice for 30 minutes with purified Csm2-Psy3 complex (3.0  $\mu$ M) in EMSA reaction buffer (10 mM Tris pH 8.0, 50 mM NaCl, 2 mM DTT, 4 mM  $MgCl_2$ ) in a reaction volume of 10  $\mu$ l. Equilibrated samples were loaded on a pre-cooled and pre-run 5% native polyacrylamide gel containing 0.5X TBE and run at 200 volts for 2 hours at 4°C. The resulting gel was visualized by fluorescence using a FLA-5100 Fluorescent Image Analyzer (FujiFilm).
